# Supplementary material for: Mechanical, thermal, and microstructural analyses of thermoplastic poly(2-methoxyethyl acrylate)-based polyurethane by RAFT and polyaddition
Source: Royal Society of Chemistry journal article supplement (doi:10.1039/d0ma00816h), 2021-01-01
Supplement: d0ma00816h1.pdf [file d0ma00816h1.pdf]

Supporting information

**Mechanical, thermal, and microstructural analyses of thermoplastic poly(2-methoxyethyl acrylate)-based polyurethane by RAFT and polyaddition**

Shunsuke Tazawa <sup>a</sup>, Tomoki Maeda <sup>a,b\*</sup> and Atsushi Hotta <sup>a\*</sup>

E-mail: [hotta@mech.keio.ac.jp](mailto:hotta@mech.keio.ac.jp)

[tomoki.maeda.polymer@vc.ibaraki.ac.jp](mailto:tomoki.maeda.polymer@vc.ibaraki.ac.jp)

<sup>a</sup> *Department of Mechanical Engineering, Keio University  
3-14-1 Hiyoshi, Kohoku-ku, Yokohama 223-8522, Japan*

<sup>b</sup> *Frontier Research Center for Applied Atomic Sciences, Ibaraki University  
162-1 Shirakata, Tokai-mura, Naka-gun, Ibaraki 319-1106, Japan*

## Size exclusive chromatography (SEC) of the synthesized PMEAs

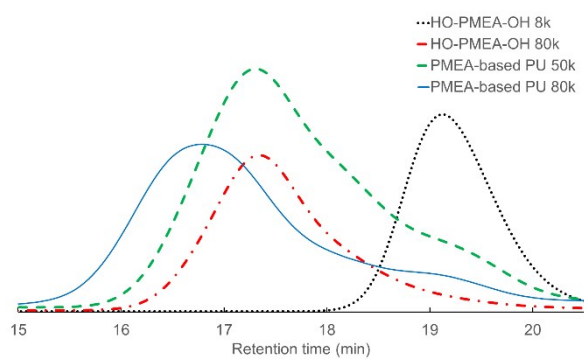

Figure S1. SEC curves of HO-PMEA-OH and PMEAs-based PU

## Dynamic mechanical analysis (DMA)

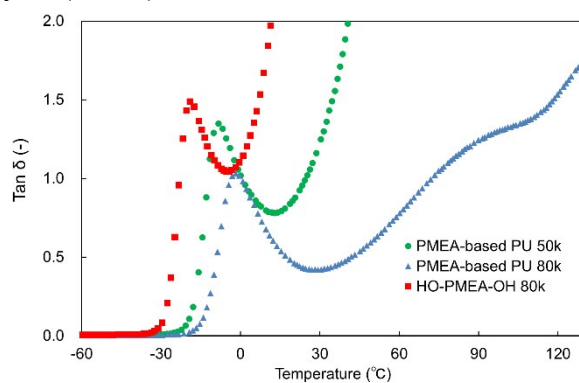

Figure S2. Loss tangent results of HO-PMEA-OH and PMEAs-based PU

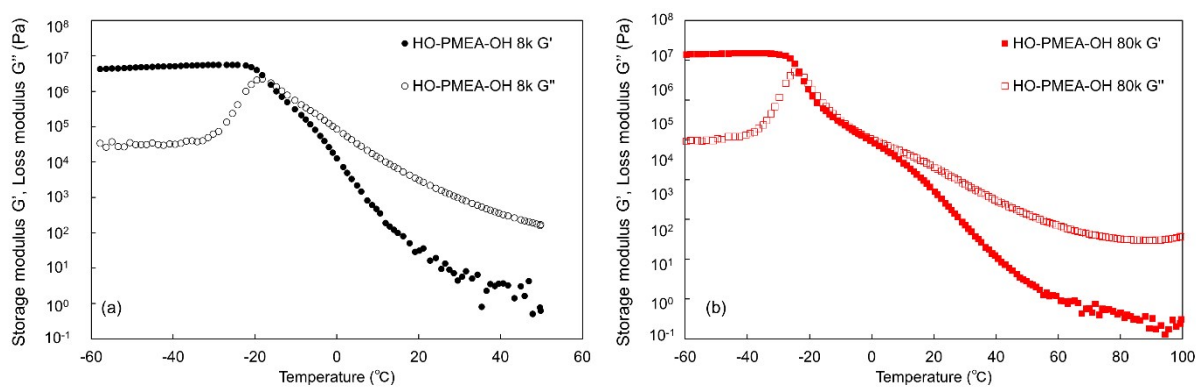

Figure S3. DMA curves of HO-PMEA-OH: (a) HO-PMEA-OH 8k and (b) HO-PMEA-OH 80k

## Thermogravimetric analysis (TGA) of HO-PMEA-OH

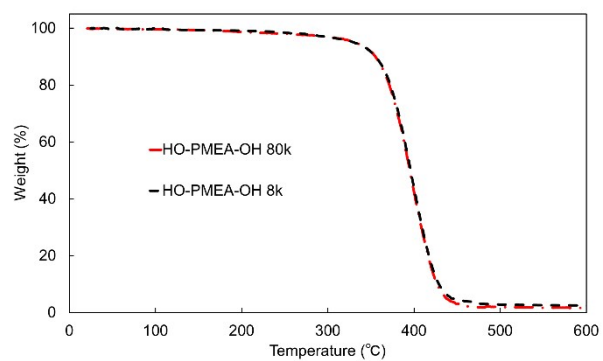

Figure S4. TGA curves of HO-PMEA-OH
